# Supplementary material for: Bioengineered NanoAid synergistically targets inflammatory pro-tumor processes to advance glioblastoma chemotherapy
Source: Royal Society of Chemistry journal article supplement (doi:10.1039/d4nr04557b), 2025-01-01
Supplement: d4nr04557b1.pdf [file d4nr04557b1.pdf]

## Supplementary Information

### **Bioengineered NanoAid synergistically targets inflammatory pro-tumor processes to advance glioblastoma chemotherapy**

Gui Zhang,<sup>a</sup> Yurui Xu,<sup>b</sup> Anwei Zhou,<sup>b</sup> Yongle Yu,<sup>c</sup> Xinghai Ning<sup>\*b</sup> and Hongguang Bao<sup>\*d</sup>

*<sup>a</sup>The Affiliated Brain Hospital of Nanjing Medical University, Nanjing 210029, China*

*<sup>b</sup>National Laboratory of Solid State Microstructures, Collaborative Innovation Center of Advanced Microstructures, Chemistry and Biomedicine Innovation Center, College of Engineering and Applied Sciences, Jiangsu Key Laboratory of Artificial Functional Materials, Nanjing University, Nanjing 210093, China.*

*<sup>c</sup>Medical College of Guangxi University, Nanning 530004, China*

*<sup>d</sup>Department of Anaesthesiology, Perioperative and pain medicine, Nanjing First Hospital, Nanjing Medical University, Nanjing 211101, China*

\*Corresponding authors.

E-mail address: xning@nju.edu.cn (X. Ning), hongguang\_bao@163.com (H. Bao).

## 1. Abbreviation and description in the manuscript

---

| Abbreviation       | Description                                                    |
|--------------------|----------------------------------------------------------------|
| PTX                | Paclitaxel                                                     |
| lipoPTX            | Liposome formulation of PTX                                    |
| lipoPC             | Liposome formulation of PTX and parecoxib                      |
| MCM                | Macrophage cell membrane                                       |
| M@lipoPTX          | MCM modified lipoPTX                                           |
| NanoAid            | MCM modified lipoPC                                            |
| COX-2              | Cyclooxygenase-2                                               |
| PCA                | Principal component analysis                                   |
| GO                 | Gene Ontology                                                  |
| KEGG               | Kyoto Encyclopedia of Genes and Genomes                        |
| cAMP               | Cyclic adenosine monophosphate                                 |
| MAPK               | Mitogen-activated protein kinase                               |
| GABAergic          | Pertaining to or producing the neurotransmitter GABA           |
| MTT                | 3-(4,5-dimethylthiazol-2-yl)-2,5-diphenyltetrazolium bromide   |
| CI                 | Combination index                                              |
| BBB                | Blood-brain barrier                                            |
| SDS-PAGE           | Sodium dodecyl sulfate-polyacrylamide gel electrophoresis      |
| PSGL-1             | P-selectin glycoprotein ligand-1                               |
| LFA-1              | Lymphocyte function-associated antigen 1                       |
| VLA-4              | Very late antigen-4                                            |
| TEER               | Transepithelial electrical resistance                          |
| FRET               | Fluorescence resonance energy transfer                         |
| AUC <sub>0-∞</sub> | Area under the curve from time 0 extrapolated to infinite time |
| t <sub>1/2</sub>   | Half-life time                                                 |
| CL                 | Clearance rate                                                 |
| H&E                | Hematoxylin and eosin                                          |
| TUNEL              | TdT-mediated dUTP Nick-End Labeling                            |

---

## 2. Supplementary Figures

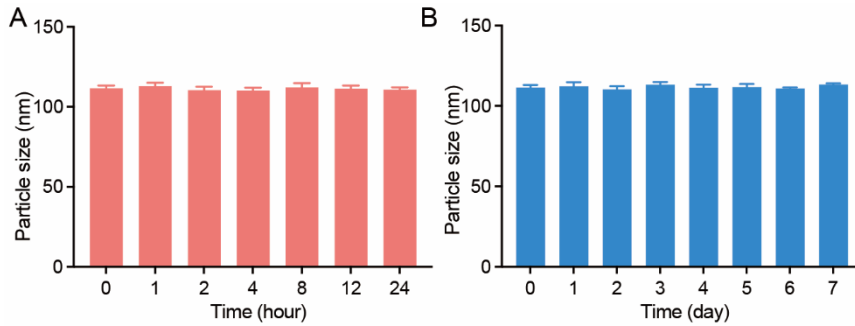

**Fig. S1.** Lipoparticle stability assessment. (A) Time-dependent serum stability of lipoparticle. The lipoparticle stability in serum was measured over a 24-hour period at 37°C using Dynamic Light Scattering (DLS). (B) Long-term storage stability of lipoparticle. The long-term storage stability of lipoparticle in PBS at 4°C was measured over seven days. The values are expressed as mean  $\pm$  SD (n = 6).

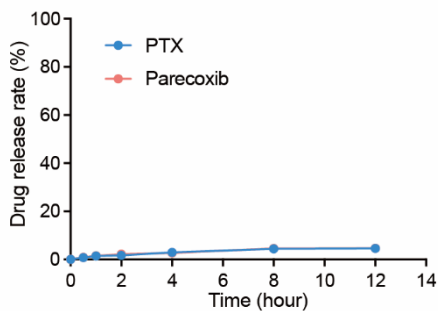

**Fig. S2.** *In vitro* drug release of PTX and Parecoxib from lipoparticle. The controlled release of PTX and parecoxib from lipoparticle over 12 hours in PBS was measured. The values are expressed as mean  $\pm$  SD (n = 6).

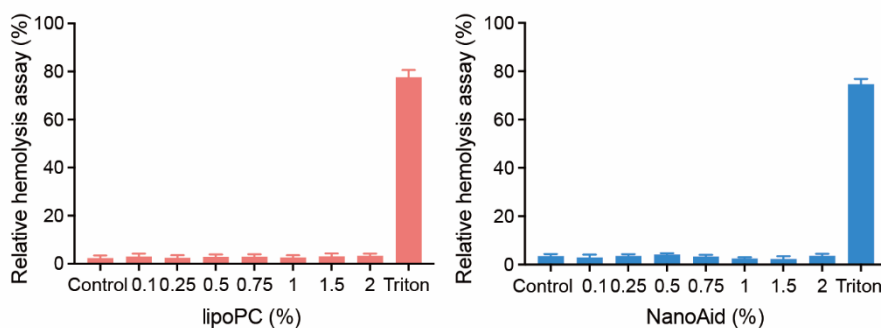

**Fig. S3.** Hemolysis of lipoparticle and NanoAid. The erythrocyte suspension, diluted with pH 7.4 PBS, was incubated with lipoparticle or NanoAid at 37°C for 2 hours, after which the relative hemolysis was calculated. The values are expressed as mean  $\pm$  SD (n = 6).

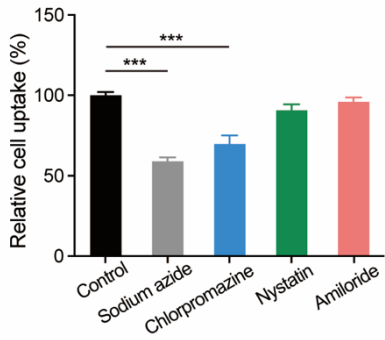

**Fig. S4.** Cellular uptake mechanism of NanoAid in U87MG cells. U87MG cells were pretreated with various inhibitors, including sodium azide, chlorpromazine, nystatin, and amiloride, followed by incubation with C6-labeled NanoAid for 6 hours. Flow cytometry analysis was used to measure the fluorescent intensity. The values are expressed as mean  $\pm$  SD (n = 6). \*\*\*p < 0.001.

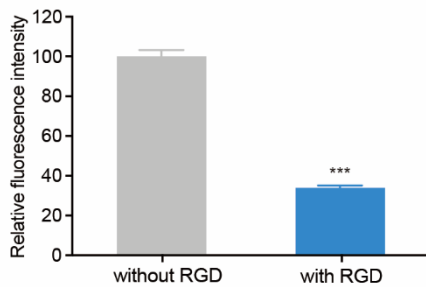

**Fig. S5.** Cell uptake of cRGD-pretreated U87MG cells after culturing with NanoAid for 6 hours. The values are expressed as mean  $\pm$  SD (n = 6). \*\*\*p < 0.001.

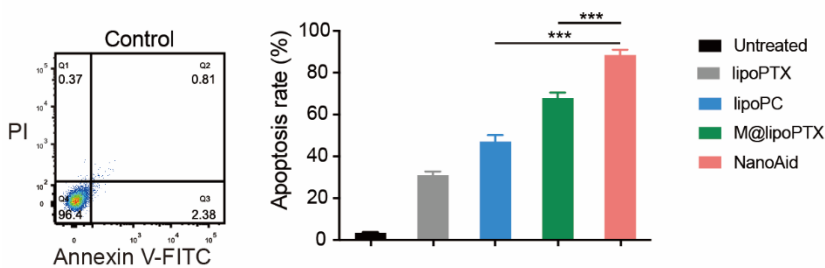

**Fig. S6.** The cell apoptotic rates of untreated, lipoPTX, lipoPC, M@lipoPTX, and NanoAid were quantified using Annexin V-FITC/PI staining. The values are expressed as mean  $\pm$  SD (n = 6). \*\*\*p < 0.001.

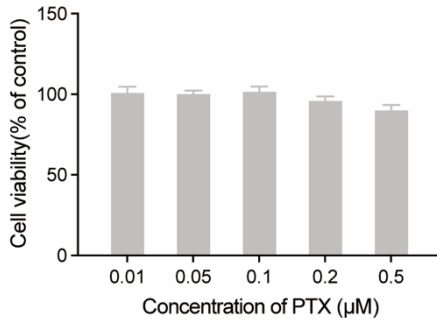

**Fig. S7.** Biosafety assessment of NanoAid in B.End3 cells. Cell viability was measured after 24-hour exposure to various concentrations of NanoAid. The values are expressed as mean  $\pm$  SD (n = 6).

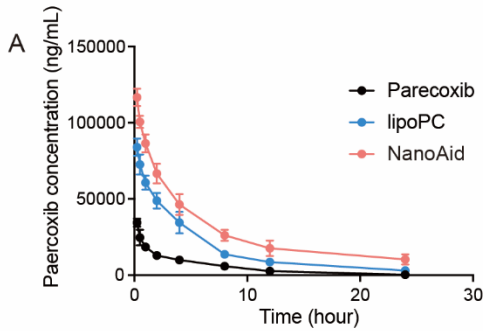

**B**

| Parameter                                          | Parecoxib        | lipoPC           | NanoAid          |
|----------------------------------------------------|------------------|------------------|------------------|
| $C_{max}$ ( $\mu\text{g/mL}$ )                     | 34.4 $\pm$ 2.6   | 83.9 $\pm$ 5.8   | 116.6 $\pm$ 5.7  |
| $t_{1/2}$ (h)                                      | 4.0 $\pm$ 0.3    | 7.9 $\pm$ 0.4    | 15.4 $\pm$ 0.2   |
| $AUC_{0-\infty}$ ( $\mu\text{g/mL}\cdot\text{h}$ ) | 146.6 $\pm$ 12.1 | 430.7 $\pm$ 23.9 | 697.3 $\pm$ 39.2 |
| CL (mL/h)                                          | 40.9 $\pm$ 3.2   | 13.9 $\pm$ 0.9   | 8.6 $\pm$ 0.4    |

**Fig. S8.** Pharmacokinetic profile of parecoxib, LipoPC, and NanoAid. (A) Plasma concentration of parecoxib. The time-dependent plasma concentration of parecoxib was determined following the intravenous injection of parecoxib, lipoPC, and NanoAid, all at a dose of 20 mg/kg. (B) Pharmacokinetic parameters of NanoAid. Various key pharmacokinetic parameters for parecoxib were measured and calculated, including the maximum concentration ( $C_{max}$ ) post-injection, plasma half-life ( $t_{1/2}$ ), area under the concentration-time curve ( $AUC_{0-\infty}$ ), and clearance (CL). These values are presented as mean  $\pm$  SD (n = 5).

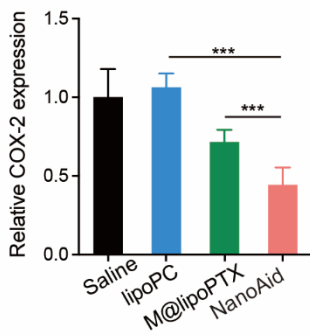

**Fig. S9.** The quantification of COX-2 in tumor slices collected after treatment with PBS, lipoPC, M@lipoPTX, and NanoAid was performed. The values are expressed as mean  $\pm$  SD (n = 5).

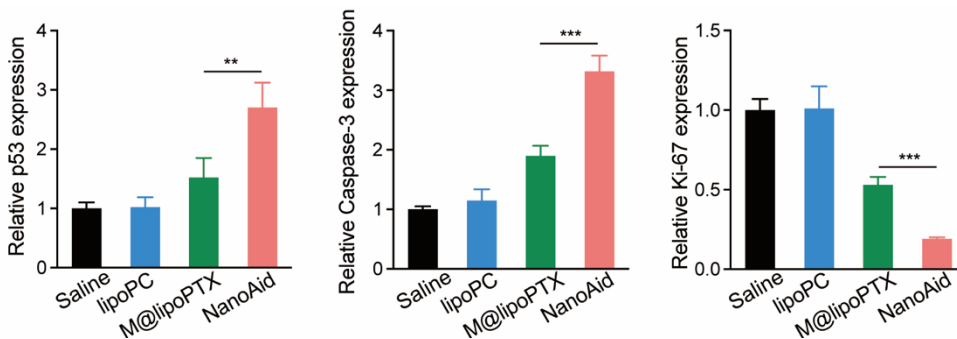

**Fig. S10.** Measurement of tumor-associated proteins, including the glioma biomarker p53, apoptosis marker Caspase-3, and proliferation marker Ki-67, after 28 days of treatment using an ELISA kit. The values are expressed as mean  $\pm$  SD (n = 5). \*\*p < 0.05, \*\*\*p < 0.001.

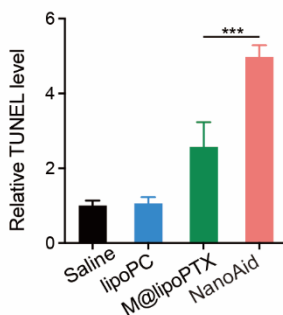

**Fig. S11.** The quantification of TUNEL staining in tumor slices collected post-treatment with PBS, lipoPC, M@lipoPTX, and NanoAid was conducted. The values are expressed as mean  $\pm$  SD (n = 5). \*\*\*p < 0.001.

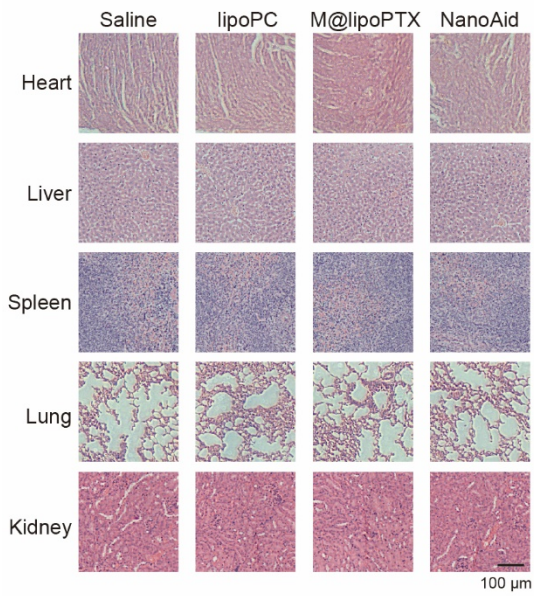

**Fig. S12.** Hematoxylin and Eosin (H&E) staining of major organs following treatment with PBS, lipoPC, M@lipoPTX, and NanoAid.

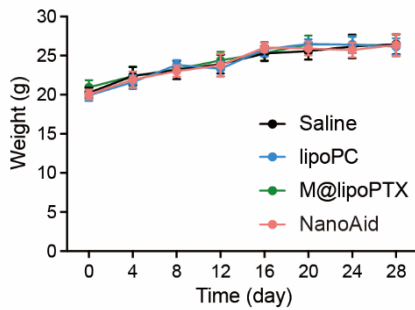

**Fig. S13.** The weight of tumor-bearing mice was monitored throughout the 28-day treatment period. The values are expressed as mean  $\pm$  SD (n = 5).

**Table S1.** Characterization of lipoPC and NanoAid.

| <b>Formulation</b>  | <b>lipoPC</b> | <b>NanoAid</b> |
|---------------------|---------------|----------------|
| Particle size (nm)  | 110.52±1.21   | 122.62±2.16    |
| Zeta potential (mV) | -23.62±1.34   | -19.26±0.27    |
| EE% (PTX)           | 97.31±0.26    | 98.26±0.19     |
| DL% (PTX)           | 2.34±0.06     | 2.29±0.12      |
| EE% (Parecoxib)     | 45.89±1.34    | 46.37±2.13     |
| DL% (Parecoxib)     | 19.43±0.86    | 20.03±1.25     |

Abbreviations: EE (encapsulation efficiency). DL (drug loading). The data are presented as means ± s. d. (n=6).

**Table S2.** Characterization of C6 or DiR labeled lipoPC and NanoAid.

| <b>Formulation</b> | <b>C6- lipoPC</b> | <b>C6-NanoAid</b> | <b>DiR-lipoPC</b> | <b>DiR-NanoAid</b> |
|--------------------|-------------------|-------------------|-------------------|--------------------|
| Particle size      | 112.3±3.1         | 125.2±1.4         | 113.6±2.3         | 124.2±0.4          |
| Zeta potential     | -23.7±0.2         | -18.7±1.3         | -23.3±1.3         | -19.5±1.3          |
| EE%                | 97.2±1.4          | 98.8±0.6          | 97.8±0.3          | 97.9±0.8           |

Abbreviations: EE (encapsulation efficiency). The data are presented as means ± s. d. (n=6).
